# Supplementary material for: Effectiveness of Risk Evaluation and Mitigation Strategies (REMS) for Lenalidomide and Thalidomide: Patient Comprehension and Knowledge Retention
Source: PubMed Central journal article supplement — Drug Saf. 2017 Jan 10;40(4):333–41. doi: 10.1007/s40264-016-0501-2 (PMC5362654; doi:10.1007/s40264-016-0501-2), 2017-01-10
Supplement: 40264_2016_501_MOESM1_ESM.pdf [file 40264_2016_501_MOESM1_ESM.pdf]

**Effectiveness of Risk Evaluation and Mitigation Strategies (REMS) for Lenalidomide and Thalidomide: Patient Comprehension and Knowledge Retention**

Nancy A Brandenburg, Robert Bwire, John Freeman, Florence Houn, Paul Sheehan, Jerome B Zeldis.

Celgene Corporation, Summit, NJ, United States.

**Corresponding author:** Paul Sheehan, Celgene Corporation, 556 Morris Ave, Summit NJ 07901, USA. [psheehan@celgene.com](mailto:psheehan@celgene.com), +01 (908) 679-1909

**INITIAL SURVEY  
Group A [FCBP]**

**I. These questions are about Thalomid (thalidomide) educational materials**

- 1. When you saw your doctor to start your Thalomid (thalidomide) treatment.**  
(Please circle your response)

|                                                 |     |    |            |
|-------------------------------------------------|-----|----|------------|
| Did you receive a Patient Information Brochure? | Yes | No | Don't know |
| Did you read the Brochure?                      | Yes | No | Don't know |
| Did you watch the video?                        | Yes | No | Don't know |

- 2. Please answer these true or false questions as best as you can.**  
(Please circle your response)

|                                                                                                   |   |   |
|---------------------------------------------------------------------------------------------------|---|---|
| Women should not get pregnant while taking Thalomid (thalidomide)                                 | T | F |
| Thalomid (thalidomide) can cause birth defects                                                    | T | F |
| Sharing Thalomid (thalidomide) with others can be dangerous                                       | T | F |
| Women who could get pregnant need to use 2 different types of birth control                       | T | F |
| Thalomid (thalidomide) users should not donate blood for others (for example, at a blood bank)    | T | F |
| Birth control pills cannot be used alone to prevent pregnancy while taking Thalomid (thalidomide) | T | F |
| It is important to stop taking Thalomid (thalidomide) <i>before</i> trying to get pregnant        | T | F |

**II. These next few questions are about your experience using Thalomid (thalidomide).**

**3. When did you start taking Thalomid (thalidomide)?**

(If you haven't begun, but expect to soon, write in when you plan to start taking Thalomid.)

\_\_\_\_\_      \_\_\_\_\_  
 Month              Year

**Or**  I don't plan to take Thalomid.

**4. Are you still taking Thalomid (thalidomide)?**

(Please circle your response).

Yes              No

**5. Have you had sex since you started on Thalomid (thalidomide)?**

(Please circle your response)

Yes      No

**6. What kind(s) of birth control did you use?**

If you haven't had sex since you started taking Thalomid (thalidomide), then mark 'YES' to show the kind(s) of birth control you *plan to use* while taking Thalomid. Please answer each question by circling your response.

|                                                                                             |     |    |
|---------------------------------------------------------------------------------------------|-----|----|
| I have not had sex since I started Thalomid (thalidomide) <u>and</u> don't plan to have sex | Yes | No |
| Birth controls pills                                                                        | Yes | No |
| Birth control patch                                                                         | Yes | No |
| Norplant                                                                                    | Yes | No |
| Depo-provera shot                                                                           | Yes | No |
| IUD                                                                                         | Yes | No |
| Diaphragm                                                                                   | Yes | No |
| Sponge                                                                                      | Yes | No |
| Cervical cap                                                                                | Yes | No |
| Condom                                                                                      | Yes | No |
| I had my tubes tied                                                                         | Yes | No |

|                                                                        |     |    |
|------------------------------------------------------------------------|-----|----|
| I am unable to get pregnant because I had change of life/menopause     | Yes | No |
| I am unable to get pregnant because _____<br>(specify)                 | Yes | No |
| My partner had a vasectomy                                             | Yes | No |
| I used (plan to use) another method of birth control<br>What was that? | Yes | No |

**7. Have you had a positive pregnancy test since you started taking Thalomid (thalidomide)?**

(Please circle your response).

No                      Yes

If yes, what happened?

- The test was wrong, I was not pregnant
- I had an abortion
- I had a miscarriage (spontaneous abortion)
- I gave birth/had a baby
- I am still pregnant    -> **What is the due date?**

\_\_\_\_\_

Month                      Day                      Year

**IV. And just a few more questions**

**8. Have you gone through change of life (menopause)?**

(Please circle your response)

No    Yes → If "yes" when was your last menstrual period?    \_\_\_\_\_

Month                      Year

**9. Have your periods stopped because of surgery (uterus and/or both ovaries removed), other medical therapy or chemotherapy?**

(Please circle your response)

No    Yes → If "yes" when was this?    \_\_\_\_\_

Month                      Year

**10. What is today's date?**

\_\_\_\_\_  
Month          Day          Year

**11. In what year were you born?**

Example: 1945          \_\_\_\_\_  
Year

Thank you for filling out this survey. Your participation will help us improve these education programs and better serve all Thalomid (thalidomide) users. **If you still have any questions, please talk to your doctor.**

**If you have stopped taking Thalomid (thalidomide) and have remaining drug, please call 1-888-4-CELGENE (235436) for instruction on drug return.**

**If you would like to complete this survey either by phone or via the web, please call 1-888-508-8079 for further assistance.**
